# Supplementary material for: Relativistic effects on the aromaticity of the halogenated benzenes: C6X6, X = H, F, Cl, Br, I, At
Source: Royal Society of Chemistry journal article supplement (doi:10.1039/c6cp05265g), 2016-01-01

**Figure S2**

Scalar relativistic (spin-free), induced current density on the plane of the ring and at 1 bohr distance from the plane of the ring, for halogenated benzenes. Higher magnitudes of the current density are represented by streamlines with redder (darker) colors. All figures are at the same scale.

---

Induced current density on the plane of the ring.

Induced current density at 1 bohr from the plane of the ring.

---

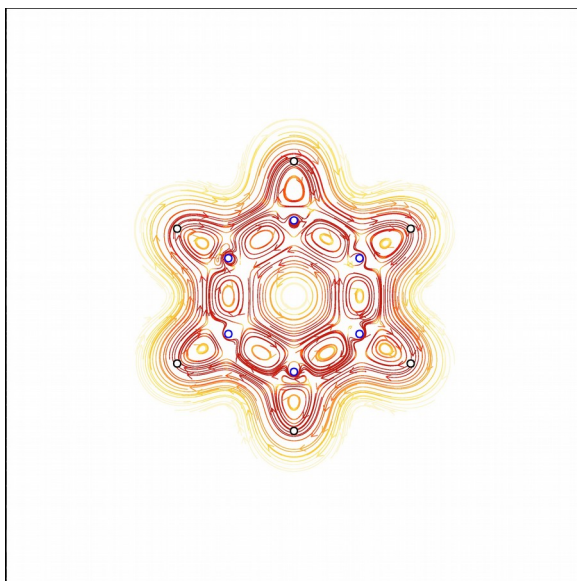

Benzene, C<sub>6</sub>H<sub>6</sub>

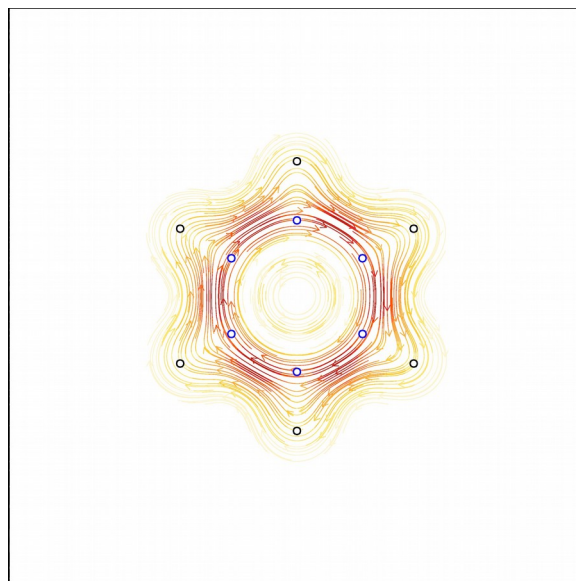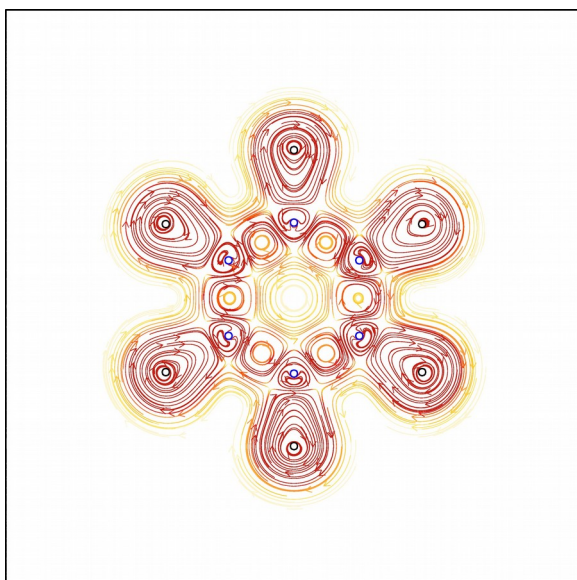

C<sub>6</sub>F<sub>6</sub>

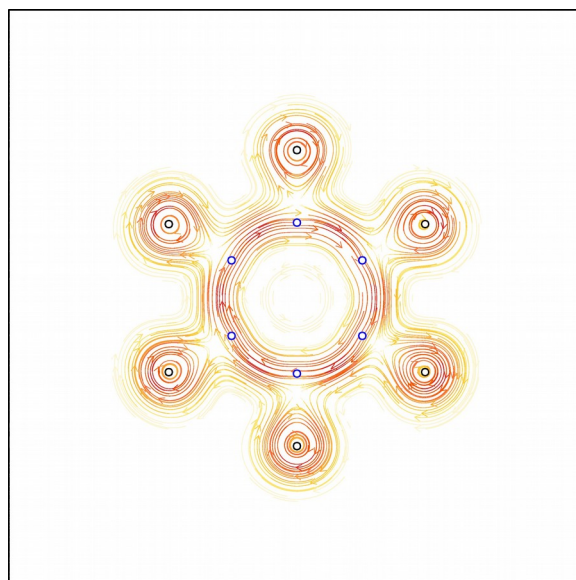

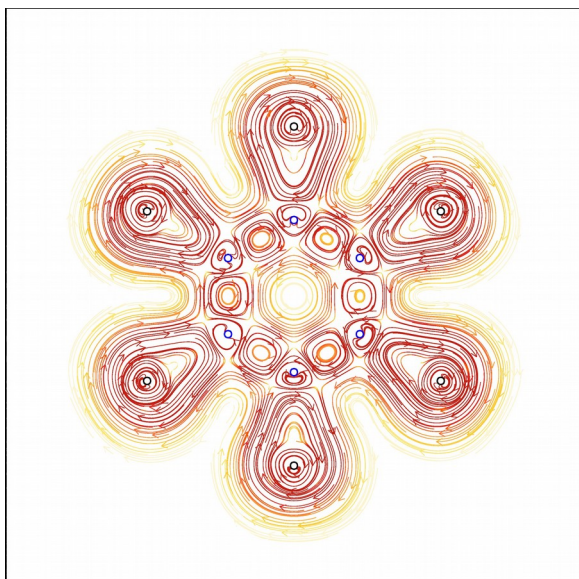

$C_6Cl_6$

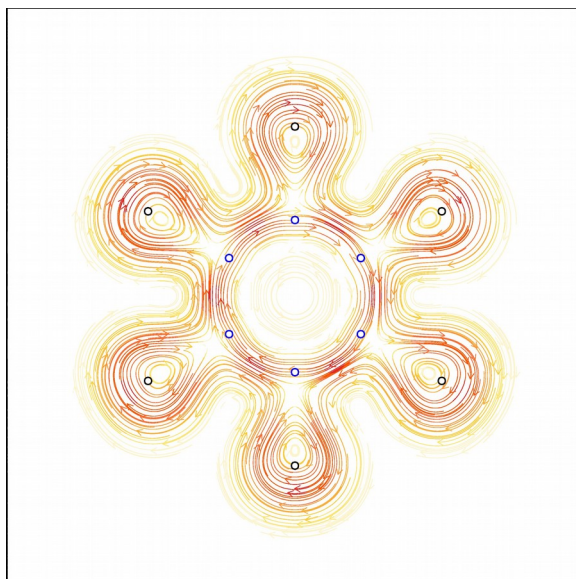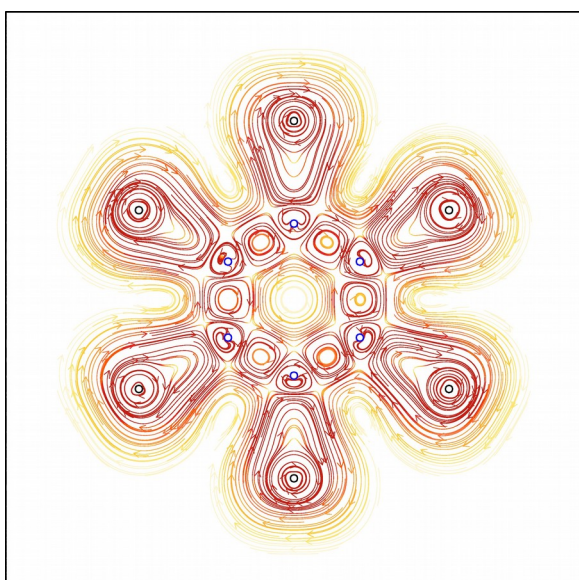

$C_6Br_6$

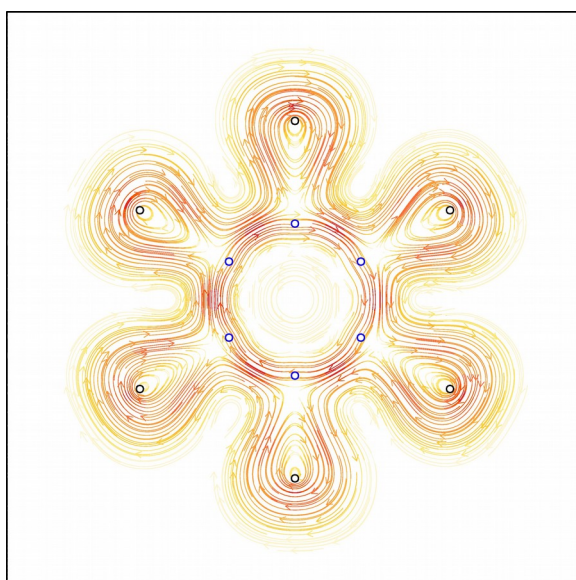

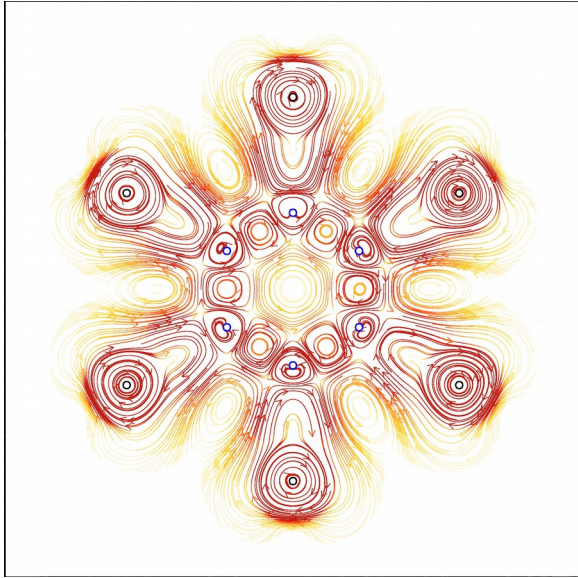

$C_6I_6$

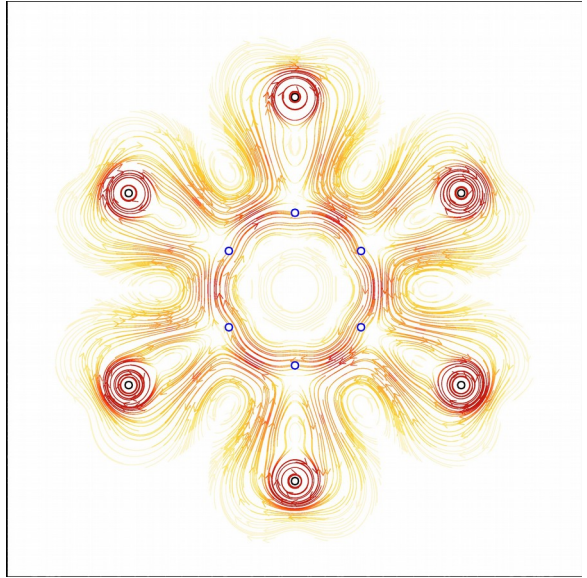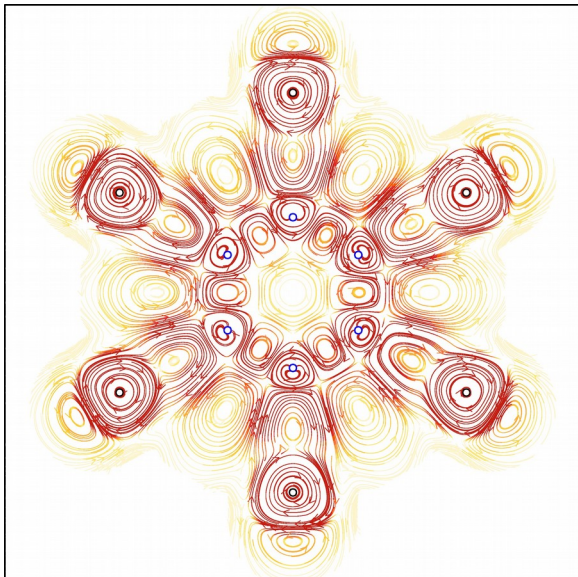

$C_6At_6$

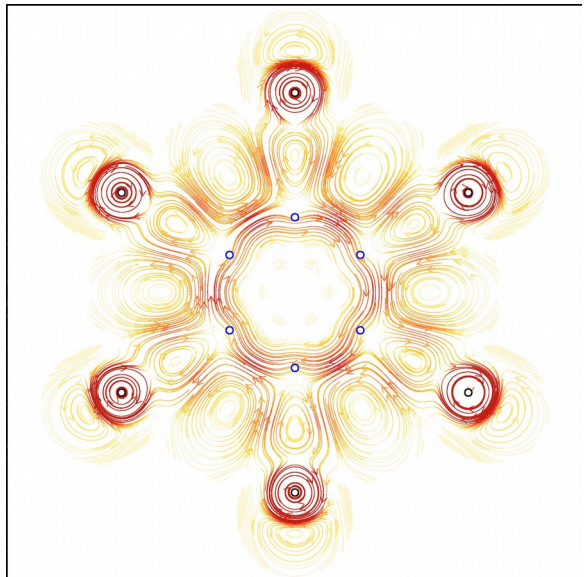

Supplement: c6cp05265g2.pdf [file c6cp05265g2.pdf]
